# Supplementary material for: Lyoprotective Effects of Mannitol and Lactose Compared to Sucrose and Trehalose: Sildenafil Citrate Liposomes as a Case Study
Source: MDPI journal article supplement (doi:10.3390/pharmaceutics13081164), 2021-07-28
Supplement: s1 [file s1]

# Supplementary Materials: Lyoprotective Effects of Mannitol and Lactose Compared to Sucrose and Trehalose: Sildenafil Citrate Liposomes as a Case Study

María José de Jesús Valle, Andreia Alves, Paula Coutinho, Maximiano Prata Ribeiro, Cristina Maderuelo and Amparo Sánchez Navarro

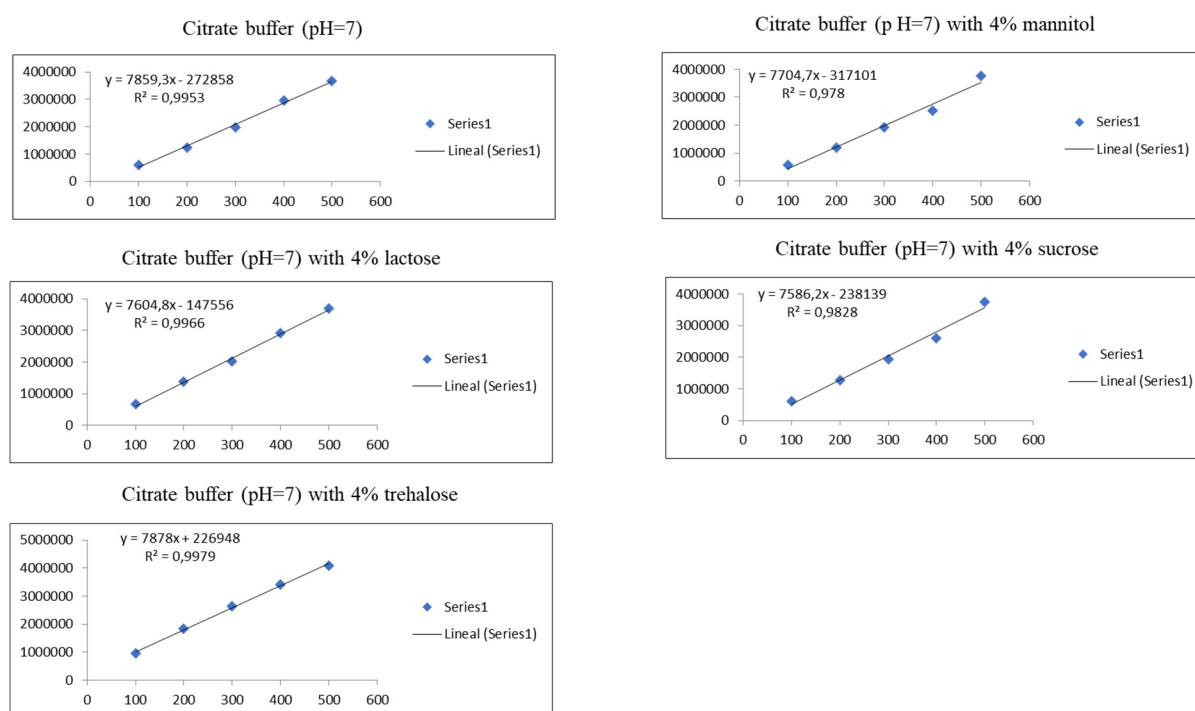

**Figure S1.** Linear relationship between chromatographic peak area (y) and drug concentration (x) for sildenafil citrate standard samples with and without additive. ( $p = 0.4060$  for the slope comparison).

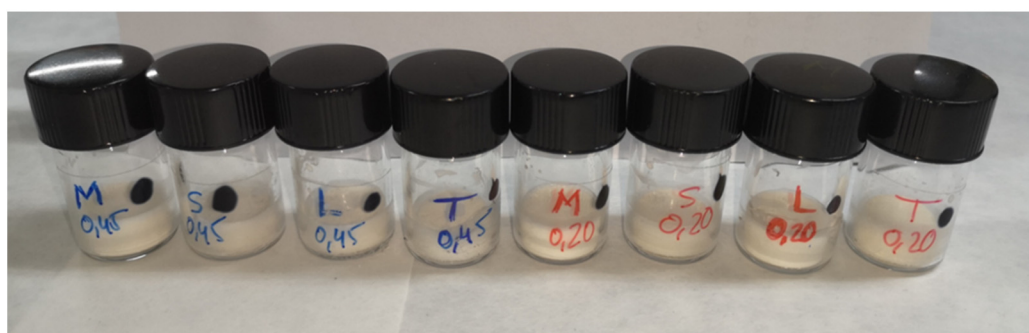

**Figure S2.** Aspect of cakes obtained after liophylisation of small and large liposomes with mannitol (M), lactose (L), sucrose (S) or trehalose (T).

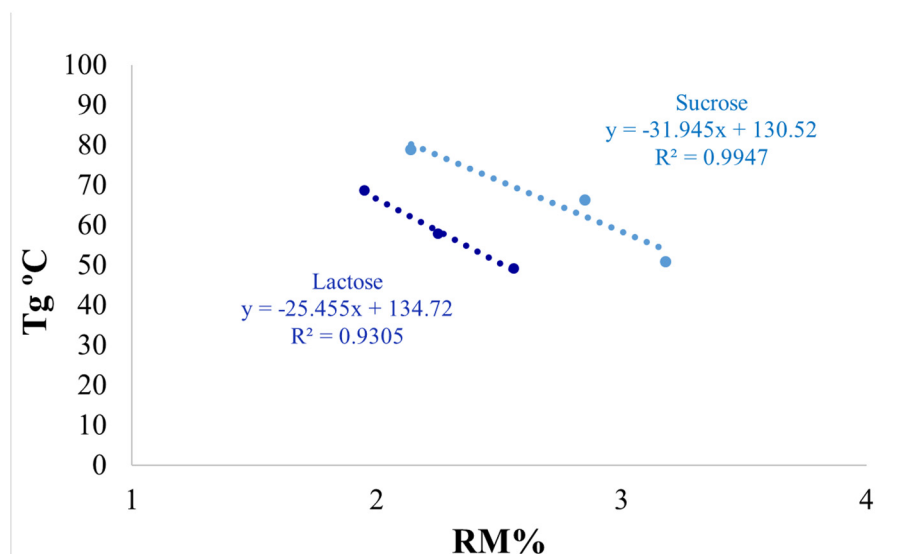

**Figure S3.** Linear relationship between remaining moisture (RM) and the onset of the peak associated to Tg.

**Table S1.** Thermal analysis of lyophilised samples with different additive.

| Additive         | Residual moisture (%) | Onset (°C) | Endset (°C) | T <sup>a</sup> peak (°C) | Integral (mJ) | dH (J/g) |
|------------------|-----------------------|------------|-------------|--------------------------|---------------|----------|
| <b>Mannitol</b>  | 3.01                  | 63.50      | 75.60       | 71.04                    | 63.75         | -12.88   |
| <b>Mannitol</b>  | 2.57                  | 65.20      | 76.82       | 72.04                    | -63.15        | -12.53   |
| <b>Mannitol</b>  | 2.56                  | 58.73      | 74.44       | 70.19                    | -46.32        | -11.41   |
| <b>Lactose</b>   | 3.18                  | 50.92      | 67.49       | 59.22                    | -7.52         | -1.53    |
| <b>Lactose</b>   | 2.85                  | 66.35      | 110.95      | 77.85                    | -54.08        | -11.58   |
| <b>Lactose</b>   | 2.14                  | 78.92      | 106.29      | 87.87                    | -44.05        | -8.57    |
| <b>Sucrose</b>   | 2.56                  | 49.14      | 57.03       | 53.38                    | -2.03         | -0.46    |
| <b>Sucrose</b>   | 2.25                  | 57.82      | 67.52       | 62.37                    | -3.82         | -0.85    |
| <b>Sucrose</b>   | 1.95                  | 68.64      | 84.15       | 75.55                    | -14.09        | -2.76    |
| <b>Threalose</b> | 2.53                  | 88.67      | 105.17      | 97.90                    | -7.58         | -1.43    |
| <b>Threalose</b> | 2.35                  | 54.12      | 85.98       | 75.10                    | -11.06        | -2.19    |
| <b>Threalose</b> | 2.07                  | 45.82      | 90.90       | 62.60                    | -28.87        | -6.40    |
